# Supplementary material
Source: HighWire-hosted journal article supplement (https://www.cmaj.ca/highwire/filestream/75878/field_highwire_adjunct_files/0/200562-five-1-at.pdf)
Supplement: 200562-five-1-at.pdf [file 200562-five-1-at.pdf]

## Appendix 1 (as supplied by authors)

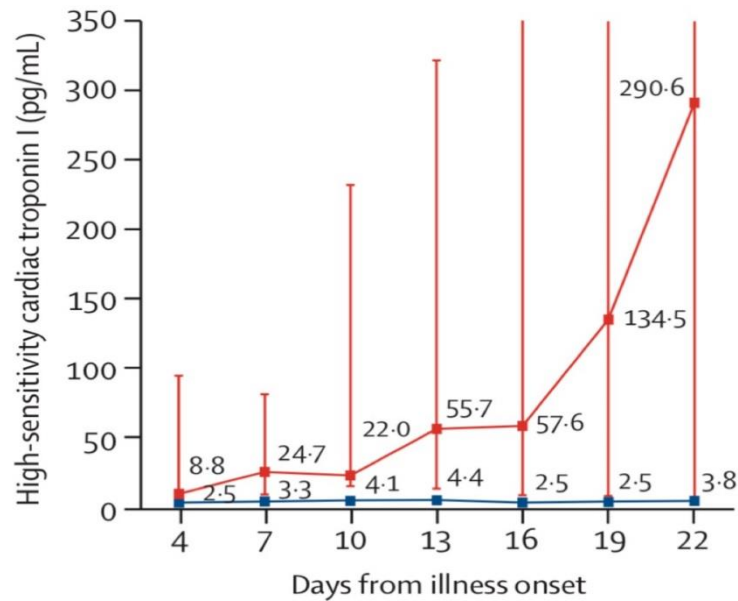

Troponin trajectories among hospitalized survivors (blue line) and nonsurvivors (red line) with coronavirus disease 2019. Reprinted from *The Lancet*, Vol. 395, Zhou F, Yu T, Du R, et al. Clinical course and risk factors for mortality of adult inpatients with COVID-19 in Wuhan, China: a retrospective cohort study, 1054-62, Copyright (2020), with permission from Elsevier.
